# Supplementary material for: Deployment and evaluation of an NH 4 + /H 3 O + reagent-ion switching chemical ionization mass spectrometer for the detection of reduced and oxygenated gas-phase organic compounds
Source: Copernicus journal article supplement (doi:10.5194/egusphere-2024-1738), 2024-07-18
Supplement: Supplementary file 1 [file egusphere-2024-1738-supplement.pdf]

# **Supplemental Material to: Deployment and evaluation of an $\text{NH}_4^+/\text{H}_3\text{O}^+$ reagent-ion switching chemical ionization mass spectrometer for the detection of reduced and oxygenated gas-phase organic compounds**

Cort Zang<sup>1</sup> and Megan Willis<sup>1</sup>

<sup>1</sup>Department of Chemistry, Colorado State University, Fort Collins, CO, USA

**Correspondence:** Megan Willis (megan.willis@colostate.edu)

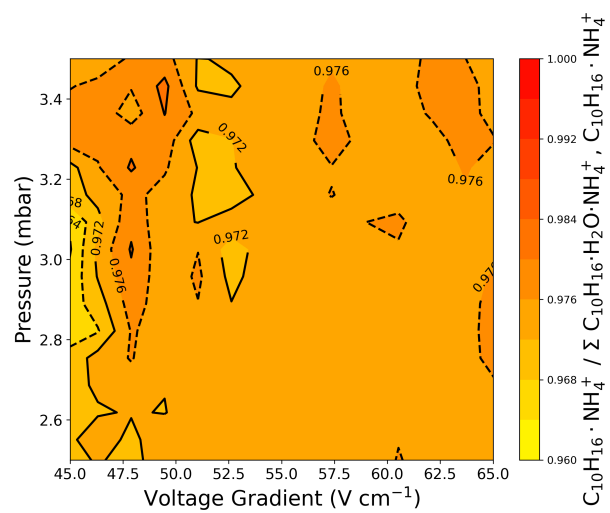

**Figure S1.** Contribution of the  $\alpha$ -pinene water cluster ( $\text{C}_{10}\text{H}_{16} \cdot \text{H}_2\text{O} \cdot \text{NH}_4^+$ ) to the sum of the water cluster and molecular ion with  $\text{NH}_4^+$ .

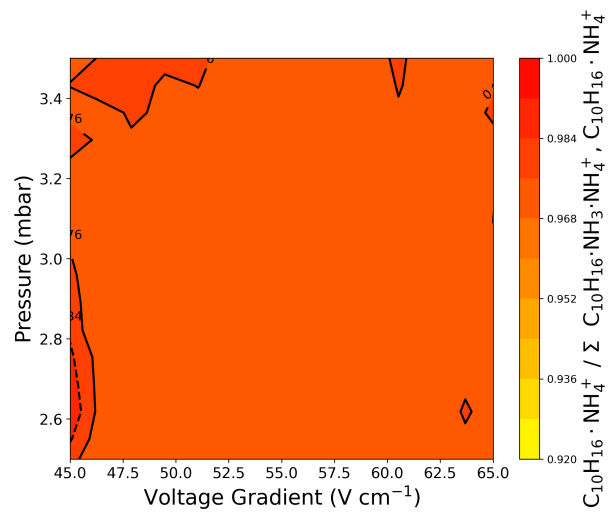

**Figure S2.** Contribution of the  $\alpha$ -pinene ammonia cluster ( $\text{C}_{10}\text{H}_{16} \cdot \text{NH}_3 \cdot \text{NH}_4^+$ ) to the sum of the ammonia cluster and molecular ion with  $\text{NH}_4^+$ .

**Table S1.** Table of  $\text{NH}_4^+$  and  $\text{H}^+$  affinities obtained from the NIST Chemistry WebBook (Edward P. Hunter and Sharon G. Lias; Michael M. Meot-Ner (Mautner) and Sharon G. Lias).

| Compound               | $\text{NH}_4^+$ Affinity<br>[kJ mol <sup>-1</sup> ] | $\text{H}^+$ Affinity<br>[kJ mol <sup>-1</sup> ] |
|------------------------|-----------------------------------------------------|--------------------------------------------------|
| Ethylene               | 42                                                  | 681                                              |
| Acetone                | 118                                                 | 812                                              |
| Methylal               | 122                                                 | <i>no data</i>                                   |
| 2-Methyl-propene       | 146                                                 | 802                                              |
| 1,2-Dimethoxy-ethane   | 160                                                 | 858                                              |
| Benzene                | 81                                                  | 750                                              |
| Cyclohexane            | 40                                                  | 687                                              |
| 1,3,5-Trimethylbenzene | 91                                                  | 836                                              |
| Hydrogen sulfide       | 48                                                  | 705                                              |
| Water                  | 86                                                  | 691                                              |
| Ammonia                | 107                                                 | 854                                              |

**Table S2.** Vapor pressure estimates of certified gas standard analytes at 25°C.<sup>a</sup>

| Analyte                | Formula                                                        | Vapor Pressure<br>$\mu\text{g m}^{-3}$ | Vapor Pressure<br>Pa | Method                             |
|------------------------|----------------------------------------------------------------|----------------------------------------|----------------------|------------------------------------|
| dimethyl sulfide       | C <sub>2</sub> H <sub>6</sub> S                                | 1.60E+9                                | 6.38E+4              | Mean VP of Antoine & Grain methods |
| methane thiol          | CH <sub>4</sub> S                                              | 3.92E+9                                | 2.02E+5              | Mean VP of Antoine & Grain methods |
| dimethyl sulfoxide     | C <sub>2</sub> H <sub>6</sub> SO                               | 2.61E+6                                | 82.9                 | Mean VP of Antoine & Grain methods |
| benzene                | C <sub>6</sub> H <sub>6</sub>                                  | 3.66E+8                                | 1.16E+4              | Mean VP of Antoine & Grain methods |
| toluene                | C <sub>7</sub> H <sub>8</sub>                                  | 1.17E+8                                | 3.16E+3              | Mean VP of Antoine & Grain methods |
| 1,3,5-trimethylbenzene | C <sub>9</sub> H <sub>12</sub>                                 | 1.30E+7                                | 268                  | Mean VP of Antoine & Grain methods |
| phenol                 | C <sub>6</sub> H <sub>6</sub> O                                | 1.63E+6                                | 43                   | Modified Grain method              |
| isoprene               | C <sub>5</sub> H <sub>8</sub>                                  | 2.02E+9                                | 7.35E+4              | Mean VP of Antoine & Grain methods |
| limonene               | C <sub>10</sub> H <sub>16</sub>                                | 1.06E+7                                | 193                  | Mean VP of Antoine & Grain methods |
| acetone                | C <sub>3</sub> H <sub>6</sub> O                                | 7.78E+8                                | 3.32E+4              | Mean VP of Antoine & Grain methods |
| hydroxyacetone         | C <sub>3</sub> H <sub>6</sub> O <sub>2</sub>                   | 6.93E+6                                | 232                  | Mean VP of Antoine & Grain methods |
| methyl ethyl ketone    | C <sub>4</sub> H <sub>8</sub> O                                | 3.81E+8                                | 1.31E+4              | Mean VP of Antoine & Grain methods |
| methyl vinyl ketone    | C <sub>4</sub> H <sub>6</sub> O                                | 3.45E+8                                | 1.22E+4              | Mean VP of Antoine & Grain methods |
| 3-hexanone             | C <sub>6</sub> H <sub>12</sub> O                               | 8.73E+7                                | 2.16E+3              | Mean VP of Antoine & Grain methods |
| 2-octanone             | C <sub>8</sub> H <sub>16</sub> O                               | 1.27E+7                                | 246                  | Mean VP of Antoine & Grain methods |
| camphor                | C <sub>10</sub> H <sub>16</sub> O                              | 8.72E+4                                | 1.42                 | Modified Grain method              |
| acetaldehyde           | C <sub>2</sub> H <sub>4</sub> O                                | 2.15E+9                                | 1.21E+5              | Mean VP of Antoine & Grain methods |
| trans-2-hexenal        | C <sub>6</sub> H <sub>10</sub> O                               | 2.49E+7                                | 629                  | Mean VP of Antoine & Grain methods |
| beta-cyclocitral       | C <sub>10</sub> H <sub>16</sub> O                              | 1.48E+6                                | 24.1                 | Mean VP of Antoine & Grain methods |
| trans-3-hexenol        | C <sub>6</sub> H <sub>12</sub> O                               | 5.05E+6                                | 125                  | Mean VP of Antoine & Grain methods |
| acetonitrile           | C <sub>2</sub> H <sub>3</sub> N                                | 4.42E+8                                | 2.67E+4              | Mean VP of Antoine & Grain methods |
| propane-1,2-diol       | C <sub>3</sub> H <sub>8</sub> O <sub>2</sub>                   | 4.54E+5                                | 14.8                 | Mean VP of Antoine & Grain methods |
| D5-Siloxane            | C <sub>10</sub> H <sub>30</sub> O <sub>5</sub> Si <sub>5</sub> | 4.35E+6                                | 29.1                 | Mean VP of Antoine & Grain methods |

<sup>a</sup> Estimated using EPI Suite (US EPA).

**Table S3.** Comparison of sensitivities calculated in this study with those reported by Xu et al. (2022).<sup>a</sup>

| Analyte                       | This Study<br>counts s <sup>-1</sup> ppt <sub>v</sub> <sup>-1</sup> | Xu et al. (2022)<br>counts s <sup>-1</sup> ppt <sub>v</sub> <sup>-1</sup> |
|-------------------------------|---------------------------------------------------------------------|---------------------------------------------------------------------------|
| Acetonitrile                  | 0.85                                                                | 0.55                                                                      |
| Acetaldehyde                  | <0.1                                                                | 0.021                                                                     |
| Acetone                       | 0.98                                                                | 1.2                                                                       |
| Isoprene                      | <0.1                                                                | 0.028                                                                     |
| Methyl vinyl ketone           | 1.5                                                                 | 1.5                                                                       |
| Methyl ethyl ketone           | 1.3                                                                 | 1.6                                                                       |
| Hydroxyacetone                | 1.6                                                                 | 2.1                                                                       |
| Benzene                       | <0.1                                                                | <0.001                                                                    |
| Phenol                        | <0.1                                                                | 0.19                                                                      |
| Hexanone <sup>b</sup>         | 3.4                                                                 | 3.8                                                                       |
| Trimethylbenzene <sup>c</sup> | <0.1                                                                | <0.001                                                                    |

<sup>a</sup> We are using a Vocus-S and Xu et al. (2022) report using a Vocus-2R which have different time-of-flight region lengths. The instruments also differ in extraction frequency (i.e., 25 kHz here, and 17.5 kHz for Xu et al. (2022)).

<sup>b</sup> This study used 3-Hexanone and Xu et al. (2022) used 2-Hexanone.

<sup>c</sup> This study used 1,2,5-Trimethylbenzene and Xu et al. (2022) used 1,3,5-Trimethylbenzene.

**Table S4.** Vapor pressure estimates of potential biogenic ROC analytes at 25°C.<sup>a</sup>

| Analyte<br><i>MCM name</i> | Formula                                         | Vapor Pressure<br>$\mu\text{g m}^{-3}$ | Vapor Pressure<br>Pa | Method                             |
|----------------------------|-------------------------------------------------|----------------------------------------|----------------------|------------------------------------|
| LIMCOOH                    | C <sub>10</sub> H <sub>18</sub> O <sub>3</sub>  | 4.40E+2                                | 0.00586              | Modified Grain method              |
| LIMAOH                     | C <sub>10</sub> H <sub>18</sub> O <sub>2</sub>  | 3.55E+3                                | 0.0517               | Modified Grain method              |
| LIMBCO                     | C <sub>10</sub> H <sub>16</sub> O <sub>2</sub>  | 7.47E+3                                | 0.11                 | Modified Grain method              |
| LIMONONIC                  | C <sub>10</sub> H <sub>16</sub> O <sub>3</sub>  | 8.77E+3                                | 0.118                | Modified Grain method              |
| APINBCO                    | C <sub>10</sub> H <sub>16</sub> O <sub>2</sub>  | 1.76E+4                                | 0.26                 | Modified Grain method              |
| PINAL                      | C <sub>10</sub> H <sub>16</sub> O <sub>2</sub>  | 3.62E+5                                | 5.34                 | Modified Grain method              |
| PINONIC                    | C <sub>10</sub> H <sub>16</sub> O <sub>3</sub>  | 6.15E+3                                | 0.0828               | Modified Grain method              |
| C109OH                     | C <sub>10</sub> H <sub>16</sub> O <sub>3</sub>  | 4.66E+2                                | 0.00627              | Modified Grain method              |
| C107OH                     | C <sub>10</sub> H <sub>16</sub> O <sub>3</sub>  | 1.99E+3                                | 0.0268               | Modified Grain method              |
| HCO5                       | C <sub>5</sub> H <sub>8</sub> O <sub>2</sub>    | 2.07E+6                                | 51.2                 | Mean VP of Antoine & Grain methods |
| LIMALNO3                   | C <sub>10</sub> H <sub>17</sub> NO <sub>6</sub> | 1.16E+1                                | 0.000116             | Modified Grain method              |
| NLIMALOH                   | C <sub>10</sub> H <sub>17</sub> NO <sub>6</sub> | 2.32E+1                                | 0.000233             | Modified Grain method              |
| MBOANO3                    | C <sub>5</sub> H <sub>11</sub> NO <sub>5</sub>  | 7.79E+3                                | 0.117                | Modified Grain method              |

<sup>a</sup> Estimated using EPI Suite (US EPA).

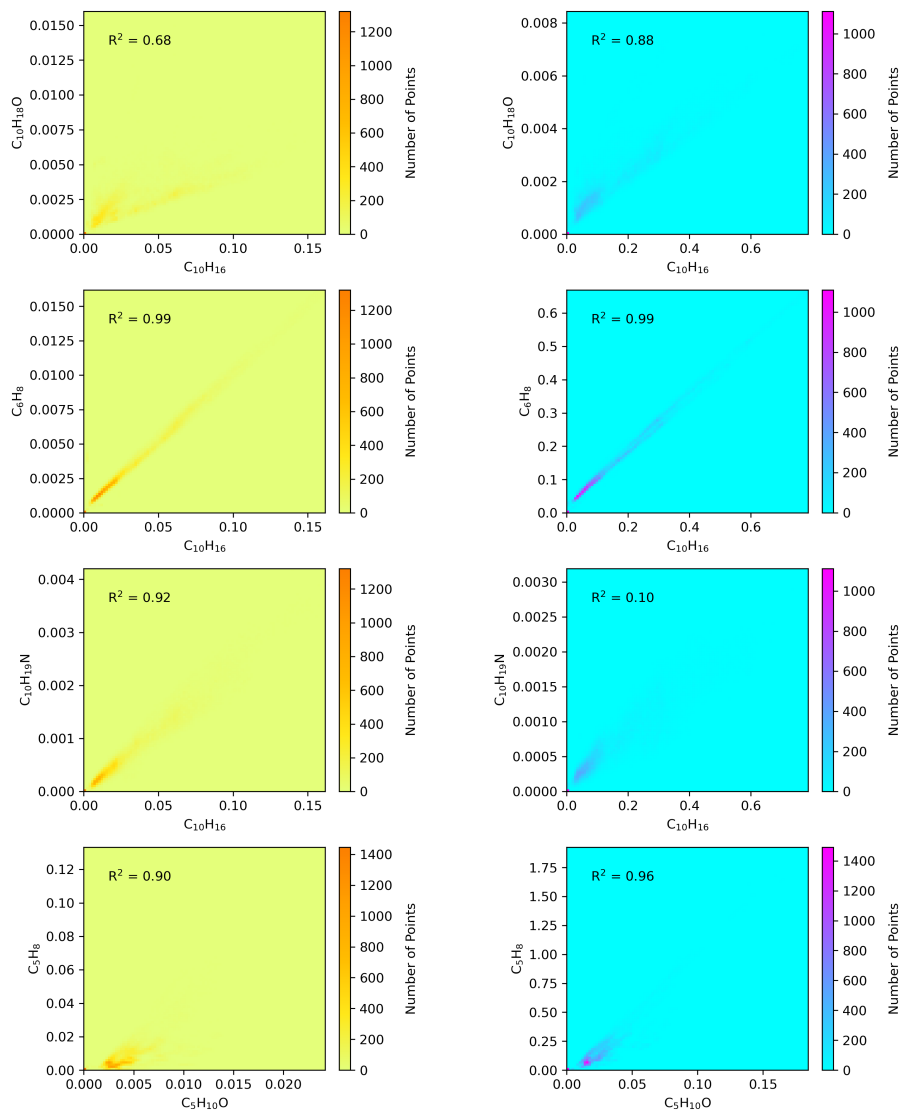

**Figure S3.** 2D-histograms of ion signals for a selection of ions detected by  $\text{NH}_4^+$  (orange/yellow, left) and  $\text{H}_3\text{O}^+$  (blue/purple, right). Color bars show frequency per bin for the 100 x100 bin grid. Signals for the ions are in counts extraction<sup>-1</sup> at 25 kHz extraction frequency.



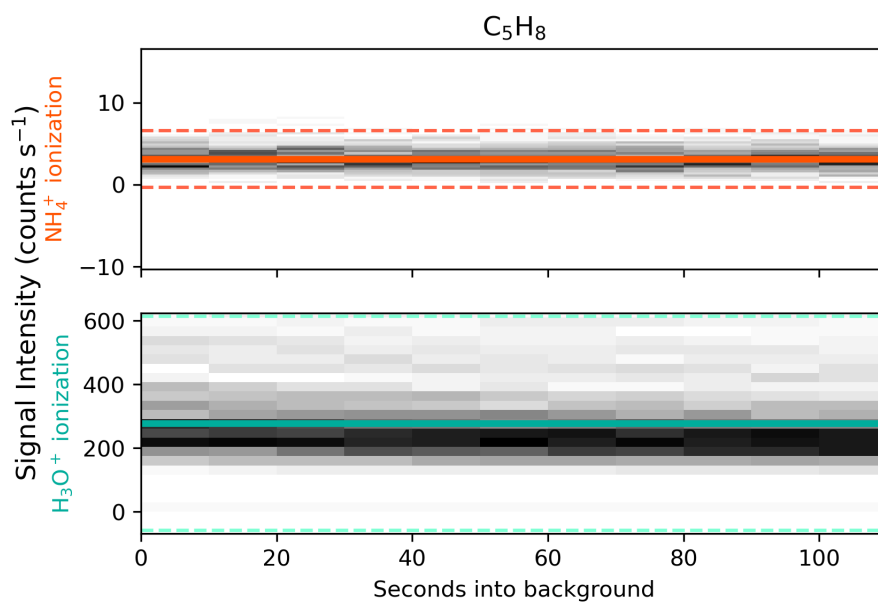

**Figure S4.** 2D-histograms of campaign zero periods for the  $C_5H_8$  ion detected with  $NH_4^+$  (orange, top) and  $H_3O^+$  (blue, bottom). Solid horizontal lines represent mean signal during zero periods and dashed lines represent  $3\sigma$  deviation from the mean.

**Table S5.** Potential structures and literature precedent for organic nitrate peaks.

| Chemical Formula                                              | Name in MCM <sup>a</sup>                                           | Reported in Fry et al. (2013)? | Potential Assignment                                                                                                                                       |
|---------------------------------------------------------------|--------------------------------------------------------------------|--------------------------------|------------------------------------------------------------------------------------------------------------------------------------------------------------|
| C <sub>5</sub> H <sub>9</sub> NO <sub>5</sub>                 | NMBOBCO<br>C4MCONO3OH                                              | no                             | 232-MBO nitrate/ Isoprene nitrate                                                                                                                          |
| C <sub>5</sub> H <sub>11</sub> NO <sub>5</sub>                | MBOANO3                                                            | no                             | 232-MBO nitrate                                                                                                                                            |
| C <sub>10</sub> H <sub>15</sub> NO <sub>3</sub>               |                                                                    | no                             | Dehydration fragment of C <sub>10</sub> H <sub>17</sub> NO <sub>4</sub>                                                                                    |
| C <sub>10</sub> H <sub>15</sub> NO <sub>4</sub>               | NC101CO<br>NC91CHO                                                 | yes (night)                    | Terpene nitrate (carbonyl)                                                                                                                                 |
| C <sub>10</sub> H <sub>15</sub> NO <sub>5</sub>               | PINALNO3                                                           | no                             | Fragment from LIMALNO3?<br>Faxon et al. (2018) speculate that it could be a fragment of dimers.<br>Oxidation of primary emissions of terpenoid oxygenates. |
| C <sub>10</sub> H <sub>15</sub> NO <sub>6</sub>               | C10PAN2<br>C923PAN<br>C918PAN<br>C108NO3                           | no                             | Terpene nitrate (PAN/carbonyl nitrate)                                                                                                                     |
| C <sub>10</sub> H <sub>17</sub> NO <sub>4</sub>               | APINCNO3<br>BPINBNO3<br>LIMANO3<br>LIMCNO3<br>APINANO3<br>BPINANO3 | yes (day and night)            | Terpene nitrate (alcohol)                                                                                                                                  |
| C <sub>10</sub> H <sub>17</sub> NO <sub>5</sub>               | NBPINAOOH<br>NAPINBOOH<br>NLIMOOH                                  | yes (night)                    | Terpene nitrate (hydroperoxy)                                                                                                                              |
| C <sub>10</sub> H <sub>17</sub> NO <sub>6</sub>               | LIMALNO3<br>NLIMALOH                                               | no                             | Limonene nitrate                                                                                                                                           |
| C <sub>10</sub> H <sub>16</sub> N <sub>2</sub> O <sub>6</sub> |                                                                    | no                             | Proposed as $\alpha$ -pinene oxidation product (Bates et al., 2022)                                                                                        |

<sup>a</sup>Exploration of the MCM is non-exhaustive (Saunders et al., 2003; Jenkin et al., 2015).

## References

- Bates, K. H., Burke, G. J. P., Cope, J. D., and Nguyen, T. B.: Secondary organic aerosol and organic nitrogen yields from the nitrate radical (NO<sub>3</sub>) oxidation of alpha-pinene from various RO<sub>2</sub> fates, *Atmospheric Chemistry and Physics*, 22, 1467–1482, <https://doi.org/10.5194/acp-22-1467-2022>, 2022.
- 5 Edward P. Hunter and Sharon G. Lias: Proton Affinity Evaluation, in: NIST Chemistry WebBook, NIST Standard Reference Database Number 69, Eds. P.J. Linstrom and W.G. Mallard, National Institute of Standards and Technology, Gaithersburg MD, 20899, <https://doi.org/https://doi.org/10.18434/T4D303>.
- Faxon, C., Hammes, J., Le Breton, M., Pathak, R. K., and Hallquist, M.: Characterization of organic nitrate constituents of secondary organic aerosol (SOA) from nitrate-radical-initiated oxidation of limonene using high-resolution chemical ionization mass spectrometry, *Atmospheric Chemistry and Physics*, 18, 5467–5481, <https://doi.org/10.5194/acp-18-5467-2018>, 2018.
- 10 Fry, J. L., Draper, D. C., Zarzana, K. J., Campuzano-Jost, P., Day, D. A., Jimenez, J. L., Brown, S. S., Cohen, R. C., Kaser, L., Hansel, A., Cappellin, L., Karl, T., Hodzic Roux, A., Turnipseed, A., Cantrell, C., Lefer, B. L., and Grossberg, N.: Observations of gas- and aerosol-phase organic nitrates at BEACHON-RoMBAS 2011, *Atmospheric Chemistry and Physics*, 13, 8585–8605, <https://doi.org/10.5194/acp-13-8585-2013>, 2013.
- 15 Jenkin, M. E., Young, J. C., and Rickard, A. R.: The MCM v3.3.1 degradation scheme for isoprene, *Atmospheric Chemistry and Physics*, 15, 11 433–11 459, <https://doi.org/10.5194/acp-15-11433-2015>, 2015.
- Michael M. Meot-Ner (Mautner) and Sharon G. Lias: Binding Energies Between Ions and Molecules, and The Thermochemistry of Cluster Ions, in: NIST Chemistry WebBook, NIST Standard Reference Database Number 69, Eds. P.J. Linstrom and W.G. Mallard, National Institute of Standards and Technology, Gaithersburg MD, 20899, <https://doi.org/https://doi.org/10.18434/T4D303>.
- 20 Saunders, S. M., Jenkin, M. E., Derwent, R. G., and Pilling, M. J.: Protocol for the development of the Master Chemical Mechanism, MCM v3 (Part A): tropospheric degradation of non-aromatic volatile organic compounds, *Atmospheric Chemistry and Physics*, 3, 161–180, <https://doi.org/10.5194/acp-3-161-2003>, 2003.
- US EPA: Estimations Programs Interface Suite for Microsoft Windows, <https://www.epa.gov/tsca-screening-tools/epi-suitetm-estimation-program-interface>.
- 25 Xu, L., Coggon, M. M., Stockwell, C. E., Gilman, J. B., Robinson, M. A., Breitenlechner, M., Lamplugh, A., Crounse, J. D., Wennberg, P. O., Neuman, J. A., Novak, G. A., Veres, P. R., Brown, S. S., and Warneke, C.: Chemical ionization mass spectrometry utilizing ammonium ions (NH<sub>4</sub><sup>+</sup> CIMS) for measurements of organic compounds in the atmosphere, *Atmospheric Measurement Techniques*, 15, 7353–7373, <https://doi.org/10.5194/amt-15-7353-2022>, 2022.
